# Supplementary material for: Video kills the sentiment—Exploring fans’ reception of the video assistant referee in the English premier league using Twitter data
Source: PLoS One. 2020 Dec 9;15(12):e0242728. doi: 10.1371/journal.pone.0242728 (PMC7725346; doi:10.1371/journal.pone.0242728)
Supplement: S4 Table — “MinuteSinceKickOff” displays the minute in which the VAR incident was detected by our algorithm. (CSV) [file pone.0242728.s004.csv]

Game	MinuteSinceKickOff
WHUTOT	13
WHUTOT	108
ARSSOU	91
BHALEI	101
CRYLIV	46
MCICHE	113
CHEWHU	65
CHEWHU	88
TOTBOU	29
TOTBOU	42
NORARS	28
NORARS	73
LEIEVE	34
LEIEVE	114
CRYBOU	22
LEIWAT	40
LIVEVE	28
SHUNEW	91
ARSBHA	12
ARSBHA	82
WHUARS	37
TOTCHE	47
TOTCHE	82
TOTCHE	108
TOTBHA	26
TOTBHA	85
BURMUN	82
BHABOU	77
NORTOT	36
ARSCHE	98
MCISHU	32
MCISHU	71
BURAVL	15
MCIEVE	15
MCIEVE	99
MCIEVE	106
SOUTOT	13
SOUTOT	41
SOUTOT	68
SOUTOT	94
WATWOL	92
WHUBOU	95
LIVSHU	67
SHUWHU	112
CHEBUR	20
CRYARS	84
EVEBHA	9
LEISOU	82
LEISOU	108
TOTLIV	40
TOTLIV	85
AVLMCI	23
ARSSHU	88
MCICRY	18
MCICRY	90
SOUWOL	84
WATTOT	6
WATTOT	15
WATTOT	29
BURLEI	97
LIVMUN	26
SHUMCI	38
LEIWHU	71
CRYSHU	91
LEICHE	22
LIVSOU	13
LIVSOU	32
BURARS	33
TOTMCI	14
TOTMCI	40
TOTMCI	81
WOLLEI	47
NORLIV	86
SOUBUR	106
ARSNEW	88
AVLTOT	44
CHEMUN	23
CHEMUN	77
CHEMUN	98
MCIWHU	24
CHETOT	71
CHETOT	101
BURBOU	78
LEIMCI	30
LEIMCI	41
LEIMCI	80
MUNWAT	72
LIVWHU	105
ARSWHU	85
ARSWHU	97
LEIAVL	80
LIVBOU	11
SOUNEW	29
SOUNEW	45
